# Supplementary material
Source: Springer Nature journal article supplement (https://www.springermedizin.de/resource/supplementary/13048_2012_117_MOESM4_ESM.pdf/9664918)

**A****ER $\alpha$** 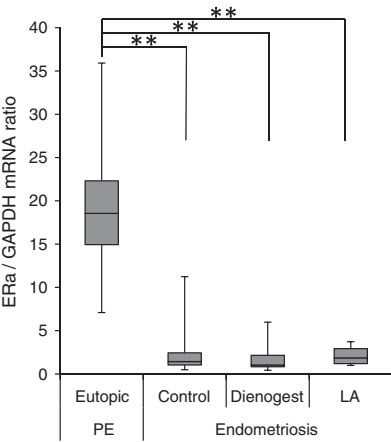**B****ER $\beta$** 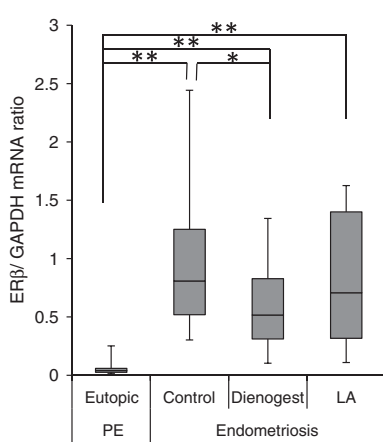**C****ER $\beta$ /ER $\alpha$** 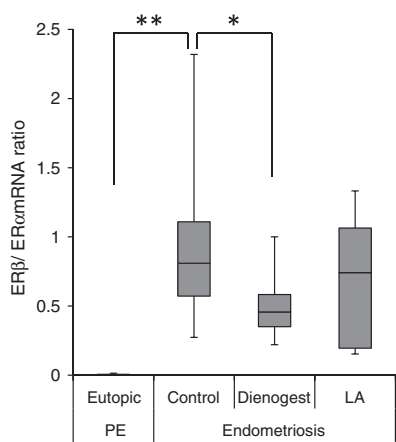

Supplement: MOESM4 [file 9664918]
